# Supplementary material
Source: PubMed Central journal article supplement (PMC2754887)

Alekseev et al., Supplemental Figure S1.

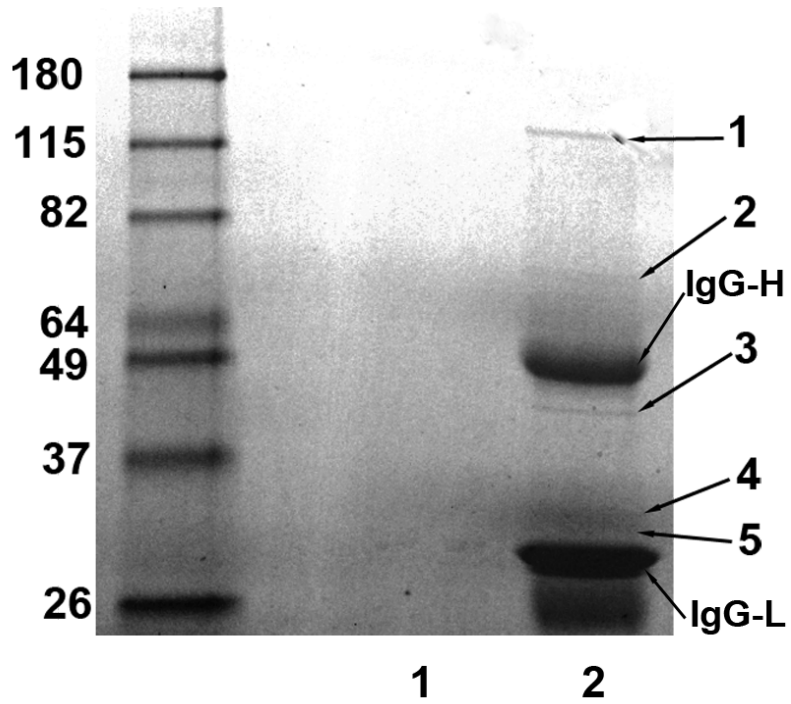

Supplement: supp_109.076497_biolreprod.109.076497-1.pdf [file supp_109.076497_biolreprod.109.076497-1.pdf]
